# Supplementary material for: Complete biosynthesis of QS-21 in engineered yeast
Source: PubMed Central journal article supplement (PMC11111400; doi:10.1038/s41586-024-07345-9), 2024-05-08
Supplement: 41586_2024_7345_MOESM1_ESM.pdf [file 41586_2024_7345_MOESM1_ESM.pdf]

**Supplementary information**

---

**Complete biosynthesis of QS-21 in  
engineered yeast**

---

In the format provided by the  
authors and unedited

## Supplementary Information

### Complete biosynthesis of QS-21 in engineered yeast

Yuzhong Liu,<sup>1,2</sup> Xixi Zhao,<sup>1,2</sup> Fei Gan,<sup>1,2</sup> Xiaoyue Chen,<sup>2,3,4</sup> Kai Deng,<sup>2,12</sup> Samantha A. Crowe,<sup>1,2,5</sup> Graham A. Hudson,<sup>1,2</sup> Michael S. Belcher,<sup>2,3,4</sup> Matthias Schmidt,<sup>2,6,7</sup> Maria C. T. Astolfi,<sup>2,8</sup> Suzanne Kosina,<sup>4</sup> Bo Pang,<sup>1,2</sup> Minglong Shao,<sup>2,6</sup> Jing Yin,<sup>2,6</sup> Sasilada Sirirungruang,<sup>2,3,4,9</sup> Anthony T. Iavarone,<sup>1</sup> James Reed,<sup>10</sup> Laetitia B. B. Martin,<sup>10</sup> Amr El-Demerdash,<sup>10,11</sup> Shingo Kikuchi,<sup>10</sup> Rajesh Chandra Misra,<sup>10</sup> Xiaomeng Liang,<sup>2,6</sup> Michael J. Cronce,<sup>2,8</sup> Xiulai Chen,<sup>2,6</sup> Chunjun Zhan,<sup>2,6</sup> Ramu Kakumanu,<sup>2,6</sup> Edward E. K. Baidoo,<sup>2,6</sup> Yan Chen,<sup>2,6</sup> Christopher J. Petzold,<sup>2,6</sup> Trent Northen,<sup>2,4</sup> Anne Osbourn,<sup>10</sup> Henrik Scheller,<sup>2,3,4</sup> Jay D. Keasling<sup>1,2,5,6,8,13,14\*</sup>

<sup>1</sup> California Institute of Quantitative Biosciences (QB3), University of California, Berkeley, CA, USA

<sup>2</sup> Joint BioEnergy Institute, Emeryville, CA, USA

<sup>3</sup> Department of Plant and Microbial Biology, University of California, Berkeley, CA 94720, USA.

<sup>4</sup> Environmental Genomics and Systems Biology Division, Lawrence Berkeley National Laboratory, Berkeley, CA, USA

<sup>5</sup> Department of Chemical & Biomolecular Engineering, University of California, Berkeley, CA, USA

<sup>6</sup> Division of Biological Systems and Engineering, Lawrence Berkeley National Laboratory, Berkeley, CA, USA

<sup>7</sup> Institute of Applied Microbiology (iAMB), Aachen Biology and Biotechnology (ABBt), RWTH Aachen University, Aachen, Germany

<sup>8</sup> Departments of Bioengineering, University of California, Berkeley, CA, USA

<sup>9</sup> Center for Biomolecular Structure, Function and Application, Suranaree University of Technology, Nakhon Ratchasima, Thailand.

<sup>10</sup> John Innes Centre, Norwich Research Park, Norwich, NR4 7UH, UK.

<sup>11</sup> Department of Chemistry, Faculty of Sciences, Mansoura University, Mansoura 35516, Egypt.

<sup>12</sup> Department of Biomaterials and Biomanufacturing, Sandia National Laboratories, Livermore, CA, USA.

<sup>13</sup> Center for Biosustainability, Danish Technical University, Lyngby, DK

<sup>14</sup> Center for Synthetic Biochemistry, Shenzhen Institutes for Advanced Technologies, Shenzhen, China

\*Correspondence: [keasling@berkeley.edu](mailto:keasling@berkeley.edu) (J.D.K)

## Table of Content

|                                                                                                     |     |
|-----------------------------------------------------------------------------------------------------|-----|
| Supplementary Table 1. List of heterologous genes for QS-21 biosynthesis .....                      | S3  |
| Supplementary Table 2. List of yeast strains used in this work .....                                | S6  |
| Supplementary Table 3. List of structures and IUPAC nomenclature of intermediates .....             | S10 |
| Supplementary Table 4. List of chemicals used in this work .....                                    | S14 |
| Supplementary Figure 1. LC-MS traces of (5) produced in YL-3 .....                                  | S15 |
| Supplementary Section 1. Gene discovery of MSBP in <i>Saponaria vaccaria</i> .....                  | S16 |
| Supplementary Table 5. <i>Arabidopsis thaliana</i> MSBP homologs in <i>Saponaria vaccaria</i> ..... | S16 |
| Supplementary Figure 2. Transcript expression profiles in <i>Saponaria vaccaria</i> .....           | S17 |
| Supplementary Figure 3. LC-MS traces of (7) produced in YL-17 .....                                 | S19 |
| Supplementary Figure 4. LC-MS traces of (8) produced in YL-18 .....                                 | S20 |
| Supplementary Figure 5. LC-MS traces of (9) produced in YL-20 .....                                 | S21 |
| Supplementary Figure 6. LC-MS traces of (11) and (12) produced in YL-27 and YL-29.....              | S23 |
| Supplementary Figure 7. LC-MS traces of (13) and (14) produced in YL-33 and YL-34.....              | S24 |
| Supplementary Figure 8. Subcellular localization studies of XylT4 .....                             | S26 |
| Supplementary Figure 9. LC-MS traces of QS-21-Api produced in YL-47 .....                           | S28 |
| Supplementary Section 2. QS-21 production and purification .....                                    | S29 |
| Supplementary Section 3. Tandem mass spectrometry .....                                             | S30 |
| Supplementary Table 6. LC-MS parameters for QS-21 MS1 and MS2 measurement .....                     | S31 |
| Supplementary Table 7. MS2 fragment ion masses and their corresponding intensities .....            | S33 |
| Supplementary Figure 10. LC-MS traces of QS-21 produced in yeast .....                              | S34 |
| Supplementary Section 4. Calculation of QS-21 content in yeast and in plant.....                    | S35 |

## Supplementary Tables

**Supplementary Table 1. List of heterologous genes for QS-21 biosynthesis**

| Enzyme                                  | Origin                                  | Short Name                          | GenBank or reference     |
|-----------------------------------------|-----------------------------------------|-------------------------------------|--------------------------|
| β-amyrin synthase                       | <i>Artemisia annua</i> L.               | AaBAS                               | ACA13386.1               |
|                                         | <i>Arabidopsis thaliana</i> (L.) Heynh. | AtBAS                               | BAG82628.1               |
|                                         | <i>Glycyrrhiza glabra</i> L.            | GgBAS                               | QBC36434.1               |
|                                         | <i>Saponaria vaccaria</i> L.            | SvBAS                               | ABK76265.1               |
| ERG20                                   | <i>Saccharomyces cerevisiae</i>         | ERG20                               | CAA89462.1               |
| ERG1                                    | <i>Saccharomyces cerevisiae</i>         | ERG1                                | CAA97201.1               |
| NADPH-cytochrome P450 reductase         | <i>Arabidopsis thaliana</i>             | ATR1                                | CAA46814.1               |
| C28 oxidase (CYP716A224)                | <i>Quillaja saponaria</i>               | QsC28 oxidase                       | Reed et al. <sup>1</sup> |
| C23 oxidase (CYP714E52)                 | <i>Quillaja saponaria</i>               | QsC23 oxidase                       | Reed et al. <sup>1</sup> |
| cytochrome b5 reductase                 | <i>Quillaja saponaria</i>               | Qsb <sub>5</sub>                    | Reed et al. <sup>1</sup> |
| C16 oxidase (CYP716A297)                | <i>Quillaja saponaria</i>               | QsC16 oxidase                       | Reed et al. <sup>1</sup> |
|                                         |                                         | TMD <sub>C28</sub> -C16 or QsC28C16 | This work                |
| Membrane steroid binding protein        | <i>Arabidopsis thaliana</i>             | AtMSBP1                             | OAO91144.1               |
|                                         | <i>Saponaria vaccaria</i>               | SvMSBP1                             | This study               |
|                                         | <i>Saponaria vaccaria</i>               | SvMSBP2                             | This study               |
| UDP-glucose dehydrogenase               | <i>Arabidopsis thaliana</i>             | AtUGD1                              | AEE30705.1               |
|                                         | <i>Arabidopsis thaliana</i>             | AtUGD1 <sub>A101L</sub>             | This study               |
| C3-UDP-glucuronic acid transferase      | <i>Quillaja saponaria</i>               | CSLM1 or CSLG1                      | Reed et al. <sup>1</sup> |
|                                         | <i>Quillaja saponaria</i>               | CSLM2 or CSLG2                      | Reed et al. <sup>1</sup> |
| C3-UDP-galactose transferase (UGT73CU3) | <i>Quillaja saponaria</i>               | C3GalT                              | Reed et al. <sup>1</sup> |
| UDP-xylose synthase 3                   | <i>Arabidopsis thaliana</i>             | AtUXS3 or ATUXS                     | AED97167.1               |
| C3-UDP-xylose transferase (UGT73CX1)    | <i>Quillaja saponaria</i>               | C3XyIT                              | Reed et al. <sup>1</sup> |

|                                                                                                                        |                             |                 |                            |
|------------------------------------------------------------------------------------------------------------------------|-----------------------------|-----------------|----------------------------|
| C3-UDP-rhamnose transferase (UGT73CX2)                                                                                 | <i>Quillaja saponaria</i>   | C3RhaT          | Reed et al. <sup>1</sup>   |
| UDP-glucose 4,6-dehydratase                                                                                            | <i>Saponaria vaccaria</i>   | SvUG46DH        | Chen et al. <sup>2</sup>   |
| Short chain dehydrogenase/reductase                                                                                    | <i>Quillaja saponaria</i>   | QsFucSyn        | Reed et al. <sup>1</sup>   |
| C28-UDP-fucose transferase (UGT74BX1)                                                                                  | <i>Quillaja saponaria</i>   | C28FucT         | Reed et al. <sup>1</sup>   |
| Trifunctional UDP-glucose 4,6-dehydratase/UDP-4-keto-6-deoxy-D-glucose 3,5-epimerase/UDP-4-keto-L-rhamnose-reductase 2 | <i>Arabidopsis thaliana</i> | AtRHM2          | CAD92667.1                 |
| C28-UDP-rhamnose transferase (UGT91AR1)                                                                                | <i>Quillaja saponaria</i>   | C28RhaT         | Reed et al. <sup>1</sup>   |
| C28-UDP-xylose transferase-3 (UGT91AQ1)                                                                                | <i>Quillaja saponaria</i>   | C28XylT3        | Reed et al. <sup>1</sup>   |
| C28-UDP-xylose transferase-4 (UGT73CY3)                                                                                | <i>Quillaja saponaria</i>   | C28XylT4        | Reed et al. <sup>1</sup>   |
| UDP-D-apiose/UDP-D-xylose synthase 1                                                                                   | <i>Arabidopsis thaliana</i> | AtAXS1          | AAR14687.1                 |
| C28-UDP-xylose transferase-4 (UGT73CY2)                                                                                | <i>Quillaja saponaria</i>   | C28ApiT4        | Reed et al. <sup>1</sup>   |
| Short-chain fatty acid CoA ligase                                                                                      | <i>Quillaja saponaria</i>   | QsCCL           | Martin et al. <sup>3</sup> |
| Chalcone-synthase like enzymes                                                                                         | <i>Quillaja saponaria</i>   | PKS4 or ChSD    | Martin et al. <sup>3</sup> |
|                                                                                                                        | <i>Quillaja saponaria</i>   | PKS5 or ChSE    | Martin et al. <sup>3</sup> |
| Keto reductases                                                                                                        | <i>Quillaja saponaria</i>   | KR1 or KR11     | Martin et al. <sup>3</sup> |
|                                                                                                                        | <i>Quillaja saponaria</i>   | KR2 or KR23     | Martin et al. <sup>3</sup> |
| Acyl transferase 1                                                                                                     | <i>Quillaja saponaria</i>   | ACT2 or DMOT9   | Martin et al. <sup>3</sup> |
| Acyl transferase 2                                                                                                     | <i>Quillaja saponaria</i>   | ACT3 or DMOT4   | Martin et al. <sup>3</sup> |
| Bifunctional UDP-D-glucose/UDP-D-galactose 4-epimerase 1                                                               | <i>Arabidopsis thaliana</i> | AtUGE1 or AtUXE | CAA90941.1                 |

|                                                         |                                     |         |                            |
|---------------------------------------------------------|-------------------------------------|---------|----------------------------|
| Reversibly glycosylated polypeptide 1                   | <i>Arabidopsis thaliana</i>         | AtRGP1  | AAC50000.1                 |
| UDP-arabinofuranose transferase (UGT73CZ2)              | <i>Quillaja saponaria</i>           | ArafT   | Martin et al. <sup>3</sup> |
| 4'-Phospho-pantetheinyl transferase                     | <i>Aspergillus nidulans FGSC A4</i> | npgA    | AAF12814.1                 |
| Lovastatin biosynthesis cluster protein F               | <i>Aspergillus terreus</i>          | LovF    | AAD34559.1                 |
| Thioesterase domain from 6-Deoxy-erythronolide Synthase | <i>Saccharopolyspora erythraea</i>  | DEBS-TE | CAA39583.1                 |

**Supplementary Table 2. List of yeast strains in this study**

| Strain     | Parent strain | Genotype                                                                                                                                               | Note                                                | Reference                |
|------------|---------------|--------------------------------------------------------------------------------------------------------------------------------------------------------|-----------------------------------------------------|--------------------------|
| Cen.pk2-1c |               | MATa; his3-1; leu2-3_112; ura:3-52; trp1-2; MAL2-8c; SUC2                                                                                              | Wild-type strain                                    | Euroscarf                |
| GTy23      | Cen.pk2-1c    | erg9::KanMX_pCTR3-ERG9, leu2-3, 112::His3MX6_pGal1-ERG19, pGal10-ERG8, ura3-52::URA3_pGal1-mvaS, pGal10- mvaE, his3Δ1::hphMX4_pGal1-ERG12, pGal10-IDI1 | Yeast strain with an upregulated mevalonate pathway | Wong et al. <sup>4</sup> |
| JWy601     | GTy23         | ura3-52 prototrophy removed for use of Cas9 system                                                                                                     | Yeast strain with an upregulated mevalonate pathway | Wong et al. <sup>4</sup> |
| MLY-AabAS  | JWy601        | 308a::pGal1-AabAS                                                                                                                                      | β-amyrin (1) producing strain                       | This study               |
| MLY-AtbAS  | JWy601        | 308a::pGal1- AtbAS                                                                                                                                     | β-amyrin (1) producing strain                       | This study               |
| MLY-GgbAS  | JWy601        | 308a::pGal1-GgbAS                                                                                                                                      | β-amyrin (1) producing strain                       | This study               |
| MLY-SvbAS  | JWy601        | 308a::pGal1-SvbAS                                                                                                                                      | β-amyrin (1) producing strain                       | This study               |
| MLY-01     | JWy601        | 1114a::pGal1-ERG20, 1622b:: pGal1-ERG1, 308a::pGal1-SvbAS                                                                                              | optomized β-amyrin (1) producing strain             | This study               |
| YL-1       | MLY-01        | 607c::pGal1-QsC28, pGal10- ATR1                                                                                                                        | Oleanolic acid (3)                                  | This study               |
| YL-2       | YL-1          | 416d::pGal1-QsC23                                                                                                                                      | Hederagenin (4)                                     | This study               |
| YL-3       | YL-1          | 416d::pGal1-QsC23, pGal10-Qsb5                                                                                                                         | Gypsogenin (5)                                      | This study               |
| YL-4       | YL-3          | 911b::pGal1-QsTMD <sub>C28</sub> -C16                                                                                                                  | Quillaic acid (QA, 6)                               | This study               |
| YL-5       | YL-4          | 805a::pGal1-SvMSBP1                                                                                                                                    | Quillaic acid (QA, 6)                               | This study               |
| YL-6       | YL-4          | 805a::pGal1-SvMSBP2                                                                                                                                    | Quillaic acid (QA, 6)                               | This study               |
| YL-7       | YL-4          | 805a::pGal1-AtMSBP1                                                                                                                                    | Quillaic acid (QA, 6)                               | This study               |
| YL-8       | YL-4          | 805a::pGal1-QsC28                                                                                                                                      | Quillaic acid (QA, 6)                               | This study               |
| YL-9       | YL-4          | 805a::pGal1-QsC23                                                                                                                                      | Quillaic acid (QA, 6)                               | This study               |
| YL-10      | YL-4          | 805a::pGal1-QsTMD <sub>C28</sub> -C16                                                                                                                  | Quillaic acid (QA, 6)                               | This study               |

|       |       |                                                                                                            |                                                  |            |
|-------|-------|------------------------------------------------------------------------------------------------------------|--------------------------------------------------|------------|
| YL-11 | YL-4  | 805a::pGal1-QsC28, pGal10- ATR1                                                                            | Quillaic acid (QA, <b>6</b> )                    | This study |
| YL-12 | YL-4  | 805a::pGal1-QsTMD <sub>C28</sub> -C16, pGal10-SvMSBP1                                                      | Quillaic acid (QA, <b>6</b> )                    | This study |
| YL-13 | YL-5  | 1414a::pGal1-QsC28, pGal10-ATR1                                                                            | Quillaic acid (QA, <b>6</b> )                    | This study |
| YL-14 | YL-5  | δ::pGal1-QsC28, pGal10-ATR1                                                                                | Quillaic acid (QA, <b>6</b> )                    | This study |
| YL-15 | YL-5  | 1414a::pGal1-QsC28, pGal10-ATR1, pGal1-QsC23, pGal10-Qsb5, pGal1-QsTMD <sub>C28</sub> -C16, pGal10-SvMSBP1 | Quillaic acid optimization (QA, <b>6</b> )       | This study |
| YL-16 | YL-15 | 106a::LEU2-3_pGal1-QsCSLM1, pGal10-AtUGD                                                                   | QA-C3-GlcA ( <b>7</b> )                          | This study |
| YL-17 | YL-15 | 106a::LEU2-3_pGal1-QsCSLM2, pGal10-AtUGD                                                                   | QA-C3-GlcA ( <b>7</b> )                          | This study |
| YL-18 | YL-15 | 106a::LEU2-3_pGal1-QsCSLM2, pGal10-AtUGD, pGal1-C3GalT                                                     | QA-C3-GlcA-Gal ( <b>8</b> )                      | This study |
| YL-19 | YL-15 | 106a::LEU2-3_pGal1-QsCSLM2, pGal10-AtUGD <sub>A101L</sub> , pGal1-QsGalT, pGal1-C3RhaT, pGal10-AtRHM2      | QA-C3-GlcA-Gal-Rha ( <b>22</b> )                 | This study |
| YL-20 | YL-15 | 106a::LEU2-3_pGal1-QsCSLM2, pGal10-AtUGD <sub>A101L</sub> , pGal1-QsGalT, pGal1-C3XylT, pGal10-AtUXS       | QA-C3-GlcA-Gal-Xyl ( <b>9</b> )                  | This study |
| YL-24 | YL-19 | 1021b::URA_pGal1-QsFucSyn, pGal10-SvUG46DH, pGal1-C28FucT                                                  | QA-C3-GlcA-Gal-Rha-C28-Fuc ( <b>23</b> )         | This study |
| YL-25 | YL-20 | 1021b::URA_pGal1-QsFucSyn, pGal10-SvUG46DH, pGal1-C28FucT                                                  | QA-C3-GlcA-Gal-Xyl-C28-Fuc ( <b>10</b> )         | This study |
| YL-26 | YL-19 | 1021b::URA_pGal1-QsFucSyn, pGal10-SvUG46DH, pGal1-C28FucT, pGal1-C28RhaT, pGal10-AtRHM2                    | QA-C3-GlcA-Gal-Rha-C28-Fuc-Rha ( <b>24</b> )     | This study |
| YL-27 | YL-20 | 1021b::URA_pGal1- QsFucSyn, pGal10-SvUG46DH, pGal1-C28FucT, pGal1-C28RhaT, pGal10-AtRHM2                   | QA-C3-GlcA-Gal-Xyl-C28-Fuc-Rha ( <b>11</b> )     | This study |
| YL-28 | YL-26 | 208a::NAT_pGal1-C28XylT3, pGal10-AtUXS                                                                     | QA-C3-GlcA-Gal-Rha-C28-Fuc-Rha-Xyl ( <b>25</b> ) | This study |
| YL-29 | YL-27 | 208a::NAT_pGal1-C28XylT3                                                                                   | QA-C3-GlcA-Gal-Xyl-C28-Fuc-Rha-Xyl ( <b>12</b> ) | This study |



|       |       |                                                                                                |                                                 |            |
|-------|-------|------------------------------------------------------------------------------------------------|-------------------------------------------------|------------|
| YL-30 | YL-27 | 208a::NAT_pGal1-C28XylT3, pGal10-AtUXS                                                         | QA-C3-GlcA-Gal-Xyl-C28-Fuc-Rha-Xyl (12)         | This study |
| YL-31 | YL-28 | 1206a::TRP_pGal1-C28XylT4, pGal10-AtUXS                                                        | QA-C3-GlcA-Gal-Rha-C28-Fuc-Rha-Xyl-Xyl (26)     | This study |
| YL-32 | YL-28 | 1206a::TRP_pGal1-C28ApiT4, pGal10-AtAXS                                                        | QA-C3-GlcA-Gal-Rha-C28-Fuc-Rha-Xyl-Api (27)     | This study |
| YL-33 | YL-30 | 1206a::TRP_pGal1-C28XylT4, pGal10-AtUXS                                                        | QA-C3-GlcA-Gal-Xyl-C28-Fuc-Rha-Xyl-Xyl (13)     | This study |
| YL-34 | YL-30 | 1206a::TRP_pGal1-C28ApiT4, pGal10-AtAXS                                                        | QA-C3-GlcA-Gal-Xyl-C28-Fuc-Rha-Xyl-Api (14)     | This study |
| YL-38 | YL-30 | 1206a::TRP_pGal1-SUMOC28XylT4, pGal10-AtUXS                                                    | QA-C3-GlcA-Gal-Xyl-C28-Fuc-Rha-Xyl-Xyl (13)     | This study |
| YL-39 | YL-30 | 1206a::TRP_pGal1-MBPC28XylT4, pGal10-AtUXS                                                     | QA-C3-GlcA-Gal-Xyl-C28-Fuc-Rha-Xyl-Xyl (13)     | This study |
| YL-40 | YL-30 | 1206a::TRP_pGal1-DsREDC28XylT4, pGal10-AtUXS                                                   | QA-C3-GlcA-Gal-Xyl-C28-Fuc-Rha-Xyl-Xyl (13)     | This study |
| YL-42 | YL-30 | YPRdelta::pGal1-QsPKS4, pGal10-PKS5, pGal1-KR1, pGal10-KR2, pGal1-QsCCL, pGal10-ACT2           | QA-C3-GlcA-Gal-Xyl-C28-Fuc-Rha-Xyl-C9 (19)      | This study |
| YL-43 | YL-42 | 1206a::TRP_pGal1-C28XylT4                                                                      | QA-C3-GlcA-Gal-Xyl-C28-Fuc-Rha-Xyl-Xyl-C9 (15)  | This study |
| YL-44 | YL-42 | 1206a::TRP_pGal1-ACT3                                                                          | QA-C3-GlcA-Gal-Xyl-C28-Fuc-Rha-Xyl-C18 (20)     | This study |
| YL-45 | YL-42 | 1206a::TRP_pGal10- ACT3, pGal1-C28XylT4                                                        | QA-C3-GlcA-Gal-Xyl-C28-Fuc-Rha-Xyl-Xyl-C18 (17) | This study |
| YL-46 | YL-42 | 1206a::TRP_pGal10-AtUXS, pGal1-C28XylT4, pGal10-AtUGE1, pGal1-AtRGP1, pGal10-ACT3, pGal1-Araft | QS-21-Xyl                                       | This study |

|          |            |                                                                                                |                                                    |            |
|----------|------------|------------------------------------------------------------------------------------------------|----------------------------------------------------|------------|
| YL-47    | YL-42      | 1206a::TRP_pGal10-AtAXS, pGal1-C28ApiT4, pGal10-AtUGE1, pGal1-AtRGP1, pGal10-ACT3, pGal1-ArafT | QS-21-Api                                          | This study |
| YL-50    | YL-46      | 720a::ZeoR_pADH2-ngpA, pGal1-LovF-TE                                                           | QS-21-Xyl                                          | This study |
| YL-51    | YL-47      | 720a::ZeoR_pADH2-ngpA, pGal1-LovF-TE                                                           | QS-21-Api                                          | This study |
| YL-QsCCL | Cen.pk2-1c | pESC-LEU::pGal10-QsCCL                                                                         | Wild-type strain overexpressing QsCCL from plasmid | This study |
| YL-npgA  | Cen.pk2-1c | $\delta$ ::pADH-npgA                                                                           | Wild-type strain overexpressing npgA               | This study |
| YL-PKS   | YL-npgA    | pESC-LEU::pGal10-QsCCL, pGal1-LovF-TE                                                          | 2-MB production from LovF-TE                       | This study |

**Supplementary Table 3. Structures and IUPAC nomenclature of glycosylated intermediates**

| Number | Trivial name               | IUPAC nomenclature                                                                                                                                            | Structure                                                                            |
|--------|----------------------------|---------------------------------------------------------------------------------------------------------------------------------------------------------------|--------------------------------------------------------------------------------------|
| 7      | QA-C3-GlcA                 | 3-O- $\{\beta$ -D-glucopyranosiduronic acid}-quillaic acid                                                                                                    | 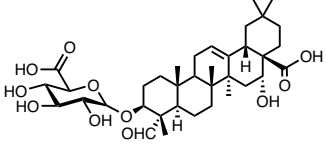   |
| 8      | QA-C3-GlcA-Gal             | 3-O- $\{\beta$ -D-galactopyranosyl-(1→2)-β-D-glucopyranosiduronic acid}-quillaic acid                                                                         |    |
| 9      | QA-C3-GlcA-Gal-Xyl         | 3-O- $\{\beta$ -D-xylopyranosyl-(1→3)-[β-D-galactopyranosyl-(1→2)]-β-D-glucopyranosiduronic acid}-quillaic acid                                               |   |
| 10     | QA-C3-GlcA-Gal-Xyl-C28-Fuc | 3-O- $\{\beta$ -D-xylopyranosyl-(1→3)-[β-D-galactopyranosyl-(1→2)]-β-D-glucopyranosiduronic acid}-28-O- $\{\beta$ -D-fucopyranosiduronic ester}-quillaic acid |  |

|    |                                        |                                                                                                                                                                                                                                                                                                                                                        |                                                                                      |
|----|----------------------------------------|--------------------------------------------------------------------------------------------------------------------------------------------------------------------------------------------------------------------------------------------------------------------------------------------------------------------------------------------------------|--------------------------------------------------------------------------------------|
| 11 | QA-C3-GlcA-Gal-Xyl-C28-Fuc-Rha         | 3-O- $\{\beta$ -D-xylopyranosyl-(1 $\rightarrow$ 3)- $[\beta$ -D-galactopyranosyl-(1 $\rightarrow$ 2)]- $\beta$ -D-glucopyranosiduronic acid}-28-O- $\{\alpha$ -L-rhamnopyranosyl-(1 $\rightarrow$ 2)- $\beta$ -D-fucopyranosiduronic ester}-quillaic acid                                                                                             | 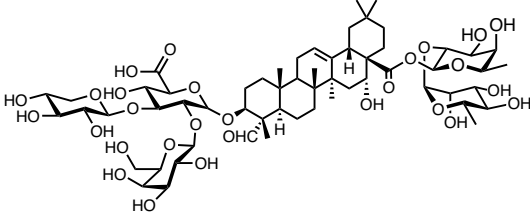   |
| 12 | QA-C3-GlcA-Gal-Xyl-C28-Fuc-Rha-Xyl     | 3-O- $\{\beta$ -D-xylopyranosyl-(1 $\rightarrow$ 3)- $[\beta$ -D-galactopyranosyl-(1 $\rightarrow$ 2)]- $\beta$ -D-glucopyranosiduronic acid}-28-O- $\{\beta$ -D-xylopyranosyl-(1 $\rightarrow$ 4)- $\alpha$ -L-rhamnopyranosyl-(1 $\rightarrow$ 2)- $\beta$ -D-fucopyranosiduronic ester}-quillaic acid                                               |    |
| 13 | QA-C3-GlcA-Gal-Xyl-C28-Fuc-Rha-Xyl-Xyl | 3-O- $\{\beta$ -D-xylopyranosyl-(1 $\rightarrow$ 3)- $[\beta$ -D-galactopyranosyl-(1 $\rightarrow$ 2)]- $\beta$ -D-glucopyranosiduronic acid}-28-O- $\{\beta$ -D-xylopyranosyl-(1 $\rightarrow$ 4)- $\beta$ -D-xylopyranosyl-(1 $\rightarrow$ 4)- $\alpha$ -L-rhamnopyranosyl-(1 $\rightarrow$ 2)- $\beta$ -D-fucopyranosiduronic ester}-quillaic acid |  |

|    |                                        |                                                                                                                                                                                                                                                                                                                                                        |                                                                                      |
|----|----------------------------------------|--------------------------------------------------------------------------------------------------------------------------------------------------------------------------------------------------------------------------------------------------------------------------------------------------------------------------------------------------------|--------------------------------------------------------------------------------------|
| 14 | QA-C3-GlcA-Gal-Xyl-C28-Fuc-Rha-Xyl-Api | 3-O- $\{\beta$ -D-xylopyranosyl-(1 $\rightarrow$ 3)- $[\beta$ -D-galactopyranosyl-(1 $\rightarrow$ 2)]- $\beta$ -D-glucopyranosiduronic acid}-28-O- $\{\beta$ -D-apiofuranosyl-(1 $\rightarrow$ 3)- $\beta$ -D-xylopyranosyl-(1 $\rightarrow$ 4)- $\alpha$ -L-rhamnopyranosyl-(1 $\rightarrow$ 2)- $\beta$ -D-fucopyranosiduronic ester}-quillaic acid | 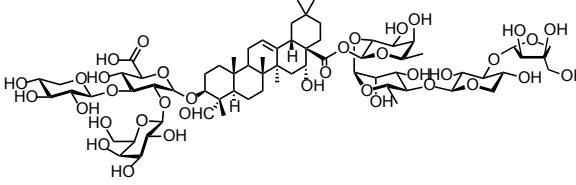   |
| 22 | QA-C3-GlcA-Gal-Rha                     | 3-O- $\{\alpha$ -L-rhamnopyranosyl-(1 $\rightarrow$ 3)- $[\beta$ -D-galactopyranosyl-(1 $\rightarrow$ 2)]- $\beta$ -D-glucopyranosiduronic acid}-quillaic acid                                                                                                                                                                                         |    |
| 23 | QA-C3-GlcA-Gal-Rha-C28-Fuc             | 3-O- $\{\alpha$ -L-rhamnopyranosyl-(1 $\rightarrow$ 3)- $[\beta$ -D-galactopyranosyl-(1 $\rightarrow$ 2)]- $\beta$ -D-glucopyranosiduronic acid}-28-O- $\{\beta$ -D-fucopyranosiduronic ester}-quillaic acid                                                                                                                                           |  |
| 24 | QA-C3-GlcA-Gal-Rha-C28-Fuc-Rha         | 3-O- $\{\alpha$ -L-rhamnopyranosyl-(1 $\rightarrow$ 3)- $[\beta$ -D-galactopyranosyl-(1 $\rightarrow$ 2)]- $\beta$ -D-glucopyranosiduronic acid}-28-O- $\{\alpha$ -L-rhamnopyranosyl-(1 $\rightarrow$ 2)- $\beta$ -D-fucopyranosiduronic ester}-quillaic acid                                                                                          |  |

|    |                                        |                                                                                                                                                                                                                                                                                                                                                           |                                                                                      |
|----|----------------------------------------|-----------------------------------------------------------------------------------------------------------------------------------------------------------------------------------------------------------------------------------------------------------------------------------------------------------------------------------------------------------|--------------------------------------------------------------------------------------|
| 25 | QA-C3-GlcA-Gal-Rha-C28-Fuc-Rha-Xyl     | 3-O- $\{\alpha$ -L-rhamnopyranosyl-(1 $\rightarrow$ 3)- $[\beta$ -D-galactopyranosyl-(1 $\rightarrow$ 2)]- $\beta$ -D-glucopyranosiduronic acid}-28-O- $\{\beta$ -D-xylopyranosyl-(1 $\rightarrow$ 4)- $\alpha$ -L-rhamnopyranosyl-(1 $\rightarrow$ 2)- $\beta$ -D-fucopyranosiduronic ester}-quillaic acid                                               | 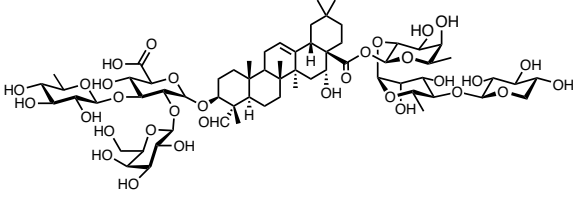   |
| 26 | QA-C3-GlcA-Gal-Rha-C28-Fuc-Rha-Xyl-Xyl | 3-O- $\{\alpha$ -L-rhamnopyranosyl-(1 $\rightarrow$ 3)- $[\beta$ -D-galactopyranosyl-(1 $\rightarrow$ 2)]- $\beta$ -D-glucopyranosiduronic acid}-28-O- $\{\beta$ -D-xylopyranosyl-(1 $\rightarrow$ 4)- $\beta$ -D-xylopyranosyl-(1 $\rightarrow$ 4)- $\alpha$ -L-rhamnopyranosyl-(1 $\rightarrow$ 2)- $\beta$ -D-fucopyranosiduronic ester}-quillaic acid |    |
| 27 | QA-C3-GlcA-Gal-Rha-C28-Fuc-Rha-Xyl-Api | 3-O- $\{\alpha$ -L-rhamnopyranosyl-(1 $\rightarrow$ 3)- $[\beta$ -D-galactopyranosyl-(1 $\rightarrow$ 2)]- $\beta$ -D-glucopyranosiduronic acid}-28-O- $\{\beta$ -D-apiofuranosyl-(1 $\rightarrow$ 3)- $\beta$ -D-xylopyranosyl-(1 $\rightarrow$ 4)- $\alpha$ -L-rhamnopyranosyl-(1 $\rightarrow$ 2)- $\beta$ -D-fucopyranosiduronic ester}-quillaic acid |  |

**Supplementary Table 4. List of chemicals for feeding or analytical standards**

| Chemical                                                | CAS #       | Source supplier          | Catalog #                              |
|---------------------------------------------------------|-------------|--------------------------|----------------------------------------|
| Squalene                                                | 111-02-4    | Sigma Aldrich            | 442785                                 |
| $\beta$ -amyrin (1)                                     | 559-70-6    | BIOSYNTH                 | FA16227                                |
| Erythrodiol (2)                                         | 545-48-2    | Sigma Aldrich            | 09258                                  |
| Oleanolic acid (3)                                      | 508-02-1    | AK Scientific            | C507                                   |
| Hederagenin (4)                                         | 465-99-6    | MedChemExpress           | HY-N0256/CS-5454                       |
| Gypsogenin (5)                                          | 639-14-5    | BIOSYNTH                 | FG74392                                |
| Gypsogenic acid                                         | 5143-05-5   | Santa Cruz Biotechnology | Sc-490170                              |
| Echinocystic acid                                       | 510-30-5    | BIOSYNTH                 | FE65561                                |
| Caulophyllogenin                                        | 52936-64-8  | BIOSYNTH                 | FC65490                                |
| Quillaic acid (6)                                       | 631-01-6    | BIOSYNTH                 | FQ74391                                |
| QA-C3-GlcA (7)                                          | NA          | John Innes Centre        | QA-mono <sup>1</sup>                   |
| QA-C3-GlcA-Gal (8)                                      | NA          | John Innes Centre        | QA-di <sup>1</sup>                     |
| QA-C3-GlcA-Gal-Xyl (9)                                  | NA          | John Innes Centre        | TriX <sup>1</sup>                      |
| QA-C3-GlcA-Gal-Rha (22)                                 | NA          | John Innes Centre        | TriR <sup>1</sup>                      |
| QA-C3-GlcA-Gal-Rha-C28-Fuc (23)                         | NA          | John Innes Centre        | TriR-F <sup>1</sup>                    |
| QA-C3-GlcA-Gal-Rha-C28-Fuc-Rha (24)                     | NA          | John Innes Centre        | TriR-FR <sup>1</sup>                   |
| QA-C3-GlcA-Gal-Rha-C28-Fuc-Rha-Xyl (25)                 | NA          | John Innes Centre        | TriR-FRX <sup>1</sup>                  |
| QA-C3-GlcA-Gal-Rha-C28-Fuc-Rha-Xyl-Xyl (26)             | NA          | John Innes Centre        | TriR-FRXX <sup>1</sup>                 |
| QA-C3-GlcA-Gal-Rha-C28-Fuc-Rha-Xyl-Api (27)             | NA          | John Innes Centre        | TriR-FRXA <sup>1</sup>                 |
| QA-C3-GlcA-Gal-Xyl-C28-Fuc-Rha-Xyl-C9 (19)              | NA          | John Innes Centre        | Tobacco extract <sup>3</sup>           |
| QA-C3-GlcA-Gal-Rha-C28-Fuc-Rha-Xyl-Api-C18-Xyl (18+Xyl) | NA          | John Innes Centre        | Generated <i>in vitro</i> <sup>3</sup> |
| QS-21                                                   | 141256-04-4 | GlaxoSmithKline          |                                        |
| (S)-(+)-2-Methylbutyric acid                            | 1730-91-2   | Sigma Aldrich            | 245526                                 |

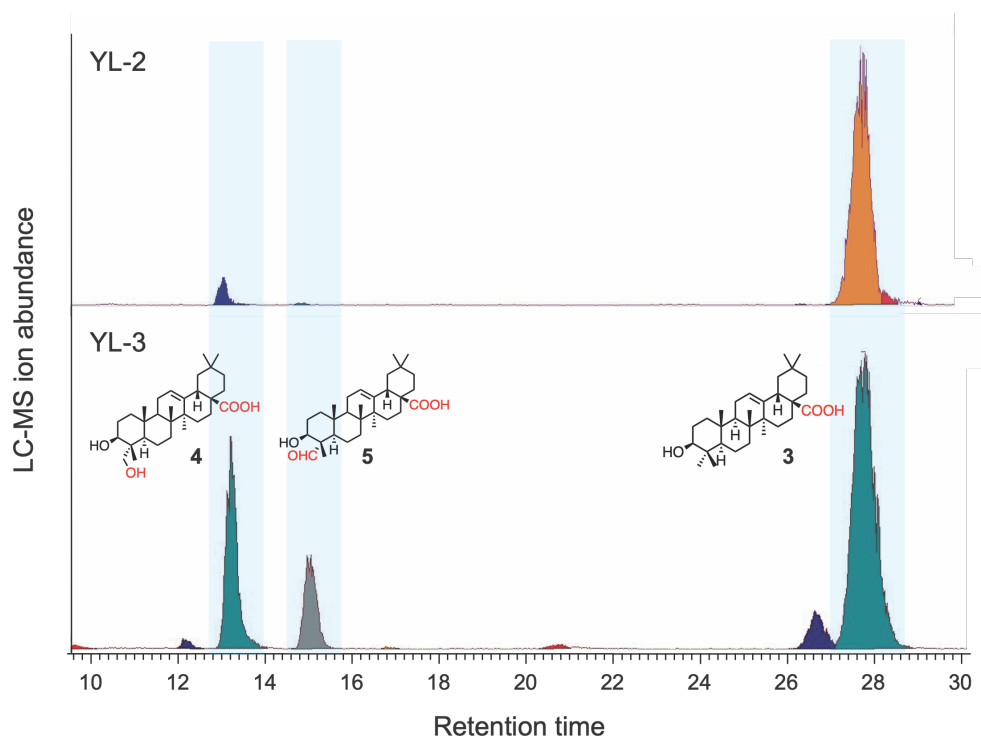

**Supplementary Fig. 1** LC-MS traces of the extract from engineered yeasts. In the absence of the *Quillaja* native cytochrome b5 (Qsb<sub>5</sub>), C23 position can only be oxidized to a hydroxyl group to form **4** in YL-2 at approximately 13.2 min retention time. When Qsb<sub>5</sub> was co-expressed in YL-3, the C23 hydroxyl group can be further oxidized to the desired aldehyde in **5**.



### Gene discovery of MSBP proteins

Identification of the target mass of vaccaroside E, segetoside I, and segetoside I Ac by LC-MS in different organs of *S. vaccaria* suggested that saponins were present in roots, stems, leaves, and flowers.<sup>2</sup> Since cytochrome P450s (CYPs) are important enzymes involved in the saponin biosynthetic pathway and MSBPs are known to co-express with P450s, leaves and flowers were both collected and analyzed to serve the purpose of cross validation. Genes encoding MSBP homologs to *Arabidopsis thaliana* (At) have been identified in *Saponaria vaccaria* (Sv) transcriptome by sequence similarity search using algorithm tBLASTn. Amino acid sequences of MSBPs from At were submitted in a database of Sv transcriptome (prepared in-house) for comparison with translated DNA sequences of all genes in the transcriptome. Similar sequences were selected based on sequence identity (last column of **Supplementary Table 5**) and the significance of sequence match (third column of **Supplementary Table 5**). The results are summarized in Supplementary Table 5 below. The average expression levels of the different homologs identified in Supplementary Table 5 were also analyzed in leaves and flowers of *Saponaria vaccaria* (see **Supplementary Fig. 2**).

**Supplementary Table 5. *Arabidopsis thaliana* (At) MSBP homologs in *Saponaria vaccaria* (Sv)**

| Query   | Sv subject*  | Sv subject length (bp) | E-value  | % Identity |
|---------|--------------|------------------------|----------|------------|
| AtMSBP1 | PB.394.2     | 695                    | 6.58E-70 | 61.86      |
|         | PB.392.2     | 930                    | 6.12E-69 | 61.86      |
|         | PB.394.1     | 1000                   | 1.57E-68 | 61.86      |
|         | PB.393.1**   | 1203                   | 8.72E-67 | 58.636     |
|         | PB.16084.1   | 960                    | 3.93E-46 | 52.381     |
|         | PB.16084.2** | 1429                   | 9.84E-45 | 52.381     |
|         | PB.38275.1   | 1014                   | 1.04E-13 | 40.244     |
| AtMSBP2 | PB.394.2     | 695                    | 1E-80    | 72.105     |
|         | PB.393.1**   | 1203                   | 7.7E-80  | 71.429     |
|         | PB.392.2     | 930                    | 1.08E-79 | 72.105     |
|         | PB.394.1     | 1000                   | 1.74E-79 | 72.105     |
|         | PB.16084.1   | 960                    | 1.31E-53 | 53.846     |
|         | PB.16084.2** | 1429                   | 4.76E-52 | 53.846     |
|         | PB.38275.1   | 1014                   | 1.6E-18  | 38.614     |

\*Transcript names

\*\*The longest 2 sequences (also showing the highest expression level in leaves and flowers in Supplementary Fig. 1) were selected for functional test in yeast (as described in the below Section 1.2.5).

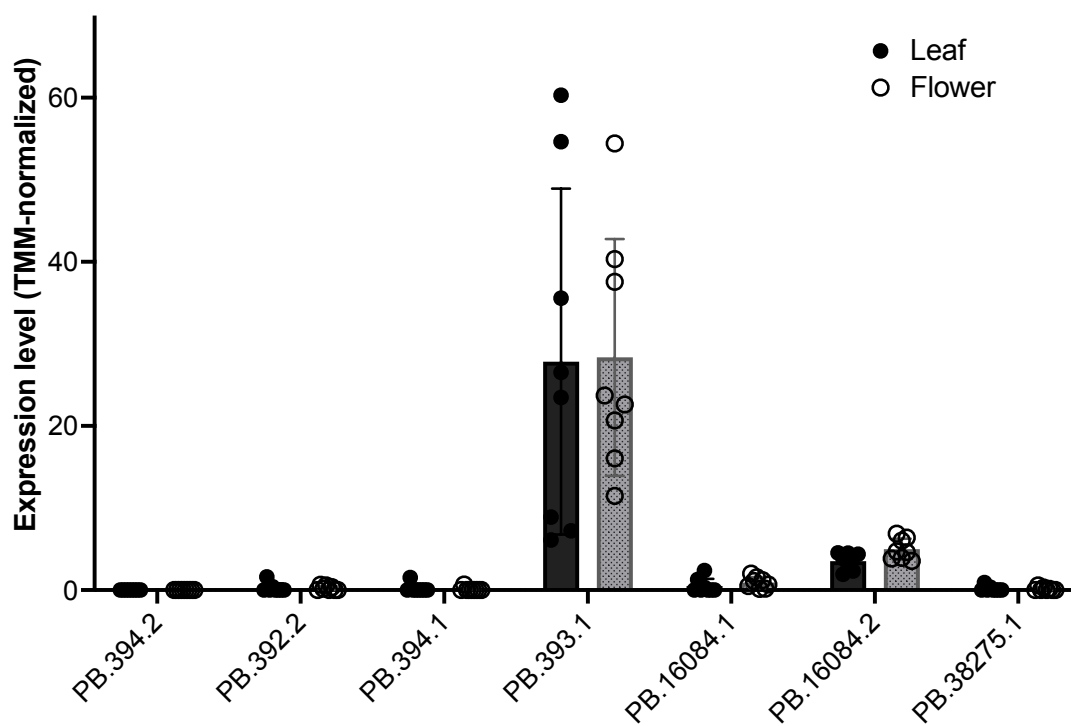

**Supplementary Fig. 2** Transcript expression profile of AtMSBP homologs in leaves and flowers of *S. vaccaria*. Data are mean  $\pm$  s.d.; n = 3 biologically independent samples.

***Arabidopsis thaliana* (At) MSBP homologs in *Saponaria vaccaria* (Sv)**

>PB.393.1 (CDS)

ATGTCAATAGAAATATGGGAAACACTGAAAGAAGCAATAACAACATACACAGGACTATCACCAACACTA  
TTCTTCACAATAGTTGCACTTAGTCTTGCATTCTACCATGCTGTTTTGGGTTATTTGGTTCATCATCATCA  
TCATCATCATCATCATCAAATAGCCACCAAATCCAAGGAATTTTGTGAGGAAAGTGAGCCTTTAC  
CACCACCTGTGCAACTTGGTGAGATTACTGAGGATGACTTGAAAACTATGATGGCTCTGATTCTAAGA  
AGCCTTTGCTTATGGCCATTAAAGGCCAGATCTATGATGTTTCCCAAAGCAGGATGTTTTATGGTCCAGG  
TGGGCCATATGCATTGTTTGCAGGAAAAGATGCAAGCAGAGCTCTGGCGAAGATGTCTGTTGAGGATA  
AAGATCTGACAGGCGATATCTCTGGTCTCGGTCCATTGAACTCGAGGCCTTACAGGACTGGGAGTACA  
AGTTCATGAGTAAATACGTCAAGGTCGGAAGTCAAAAAGGATGCTCCTCCAGTGACGCACCGTCTC  
CTAGTGAACCCTCTGAAGCTGCTGATGTTACAGACAGGGAAGCTCCCAAACACGCAGAAGATGGCCAG  
CCGAGACAGTAGAACCATCCTCTGTTGGTGATGCCGAGAAAAAAGAAGAGTAA

>PB.393.1 (aa)

MSIEIWETLKEAITTYTGLSPTLFFTIVALSLAFYHAVFGLFGSSSSSSSSSSNSHQNPRNFVEESEPLPPPVLQ  
EITEDDLKNDYDGSDDKPLLMAIKGQIYDVSQSRMFYGPGGPYALFAGKDASRALAKMSFEDKDLTGDISGL  
GPFLEALQDWEYKFMSKYVKVGTIKKDAPPSDAPSPSEPSEAADVTDREAPKHAEDGPAETVEPSSVGD  
AEKKEE\*

>PB.16084.2 (CDS)

ATGCAATTAGTCGGGCTAAGAAATATATACGGGATGTTGGTGGAAGCCATACATGATTATTTTCGGTCTG  
TCTCCAACGGCATTCTTGGTCATTGTGGGCATAATGATAGTAACTTACAAGATTGTGTGTGGAATGTTTG  
TGGCCGTCGATGATTACAAGGCAGTGAGAGATATGAAAGCGGTGTTTGAGGAGGATATGAGGCGGGA  
GCCAGTGCAGCTGGGCGACGTAACGGAGGAGGAACTCAAGGCTTATGACGGGTCTGACCCAAAGAAG  
CCGTTGCTGATGGCGATCAAGGGACAGATTTTCGACGTGTCCCGGGCAGAATGTTCTACGGTCTGCTGGT  
GGGCCCTATGCCATGTTTGTGGTCATGATGCCACCAGAGCGCTAGCTCTTATGTCTTTTATCCACAAG  
ATCTAACCGGAAACACCGATGGCCTCAGTGAATCTGAAATAGACGTCCTCGAGGATTGGGAGCTCAAGT  
TCAATGAGAAATATCCAAGGTTGGCGTACTTGTATCCAAAGCTGCTATCGTCGACAATCAGCCTCTTGA  
CACTAAAAAAGATGCTTAG

>PB.16084.2 (aa)

MQLVGLRNIYGMLVEAIHDYFGLSPTAFLVIVGIMIVTYKIVCGMFVAVDDYKAVRDMKAVFEEDMRREP  
VQLGDVTEELKAYDGSDDKPLLMAIKGQIFDVSRRMFYGPGGPYAMFAGHDATRALALMSFDPQDLTG  
NTDGLSESEIDVLEDWELKFNEKYPKVGVLVSKAAIVDNQPLDTKKDA\*

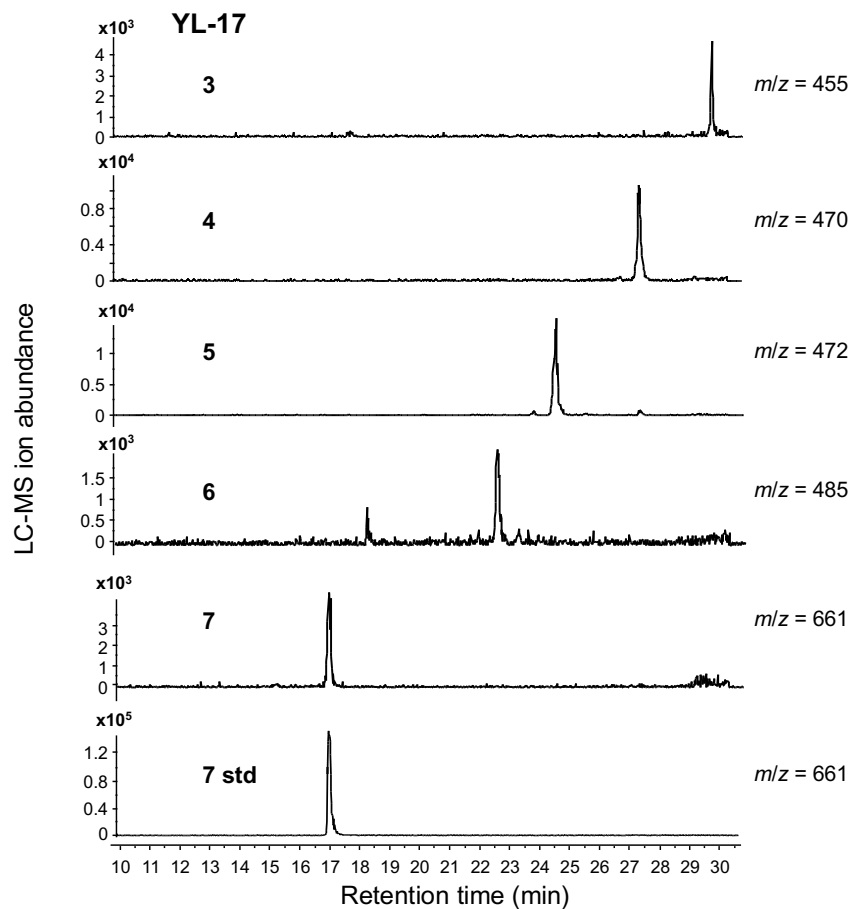

**Supplementary Fig. 3** Extracted LC-MS ion chromatograms of quillaic acid (6) and C3-glucuronidated product 7. Co-expression of UGD and the C3 glucuronidating enzyme CLSM2 in YL-17 led to the formation of a new product, which was identified to be 7.

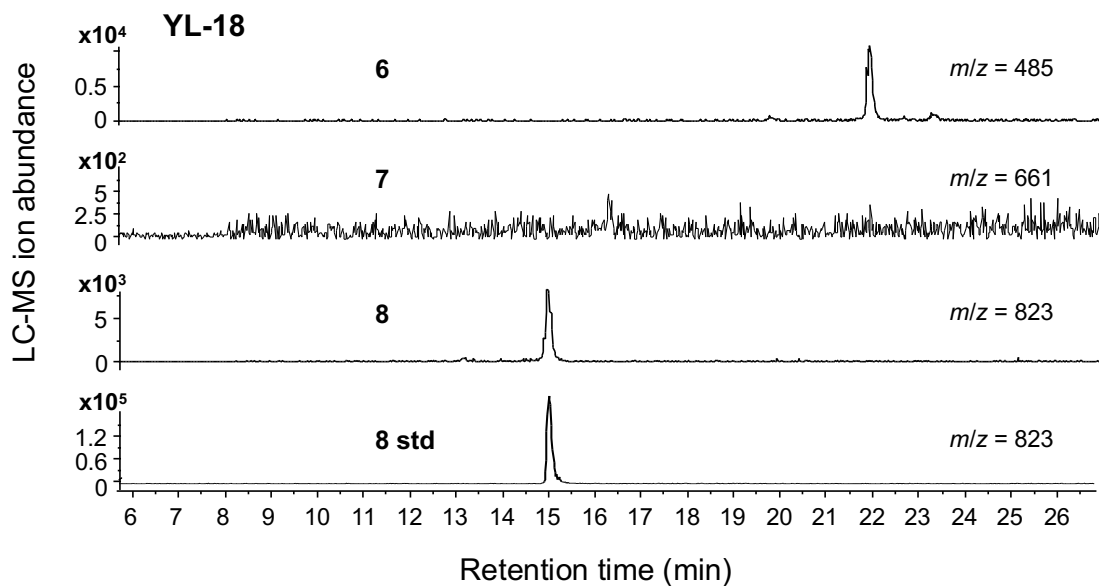

**Supplementary Fig. 4** Extracted LC-MS ion chromatograms of quillaic acid (**6**) and C3 glycosylated products. Co-expression of UGD, the C3 glucuronidating enzyme CLSM2, as well as C3GalT in YL-18 led to the detection of the di-glycosylated product **8**, which co-eluted with the chemical standard. The galactosylation is an efficient step as no residual **7** was observed.

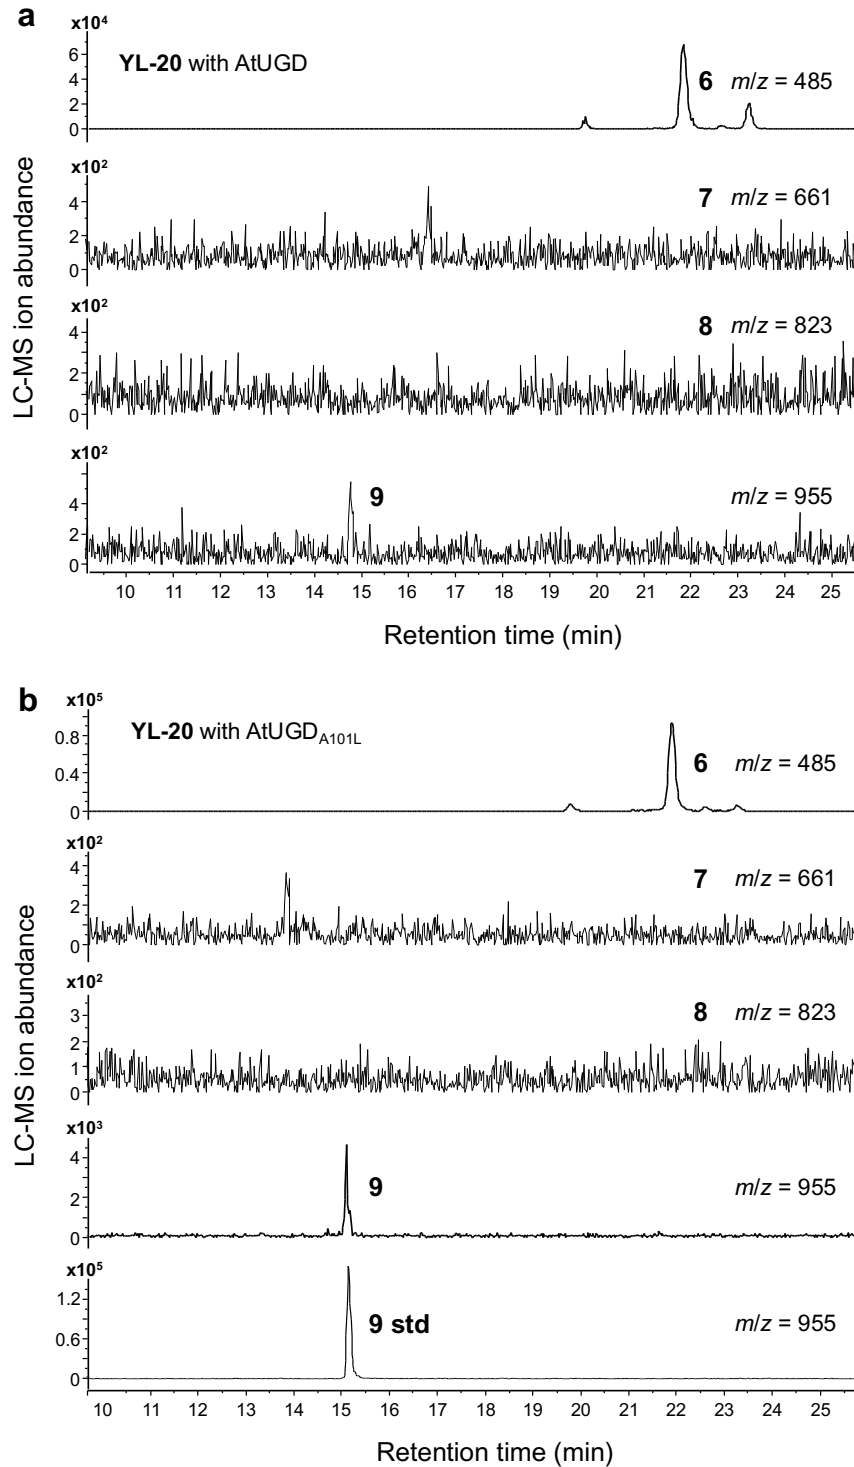

**Supplementary Fig. 5 Extracted LC-MS ion chromatograms of quillaic acid and C3 glycosylated products.** **a**, Due to the inhibition of UDP-Xyl on UDP-glucose dehydrogenase (UGD), no glycosylated products were observed when UDP-xylose synthase (UXS) was co-expressed. **b**, The AtUGD<sub>A101L</sub> mutant presumably has a lower binding affinity of UDP-Xyl, and thus, more tolerant

of UDP-Xyl, leading to the biosynthesis of the C3-fully glycosylated product (**9**). The biosynthesis of **9** was confirmed by the co-elution with the chemical standard.

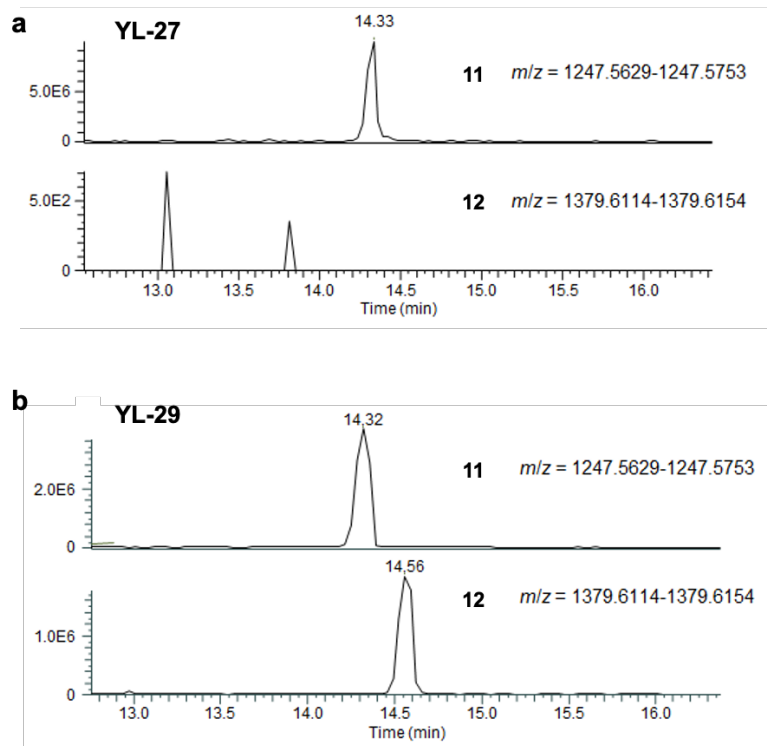

**Supplementary Fig. 6** Extracted LC-MS ion chromatograms to confirm the production of C28-tri-glycosylated terpenoid, **12**. Glycosylation of **11** produced by YL-27 (**a**) led to the formation of a new product with the high-resolution  $m/z$  of which corresponded to the molecular weight of **12** upon the expression of C28XylT3 in YL-29 shown in **b**.



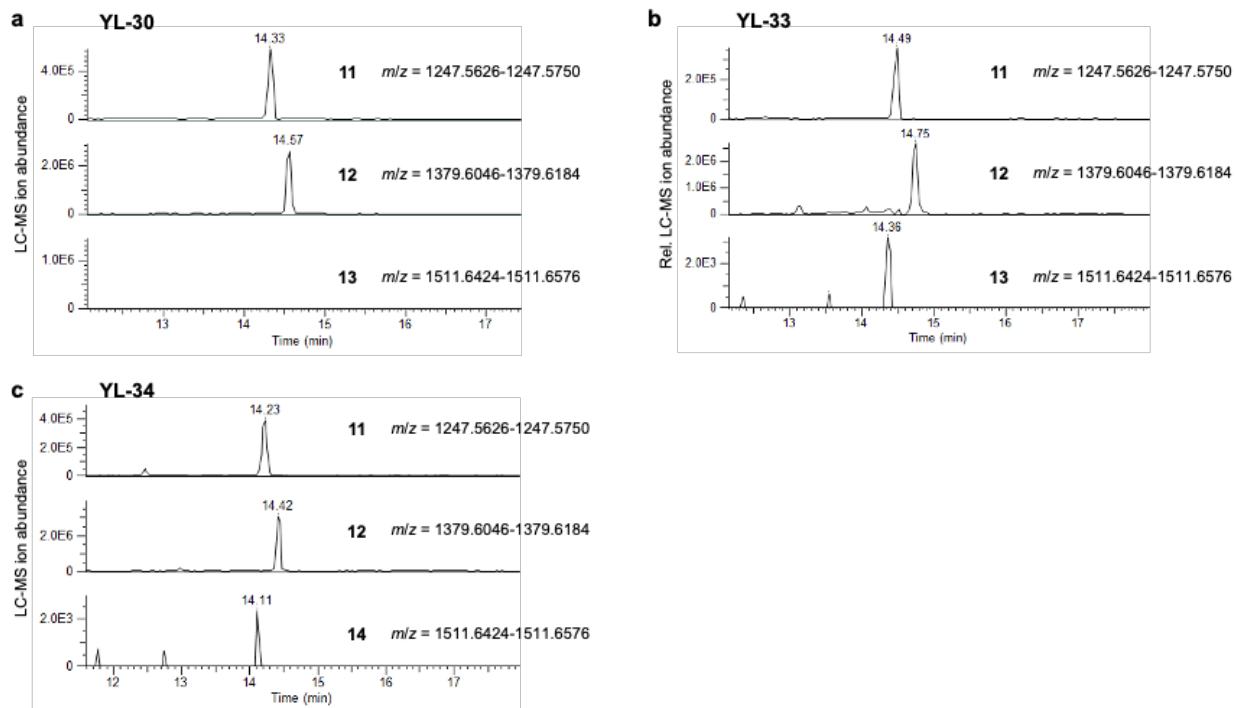

**Supplementary Fig. 7** Extracted LC-MS ion chromatograms to confirm the production of C28 fully glycosylated **13** and **14**. A new mass peak was detected that correspond to the C28-tetraglycosylated-molecule only in the presence of C28XylT4 in YL-33 (**b**) and C28ApiT in YL-34 (**c**), but not in the parent strain YL-30 (**a**).

### Subcellular localization studies of UGT73CY3

Confocal images of cells with overexpressed C-terminally mCherry-tagged HSP42, which is a yeast native chaperone protein,<sup>5,6</sup> visualized its co-localization with the GFP-tagged protein aggregates (**Supplementary Fig. 8a**), but its overexpression only had a negligible impact on GT aggregation. Efforts towards solubilizing the GT, including N- and C-terminal truncation, solubility tagging (*e.g.*, SUMO, MBP, DsRED in YL-38 to YL-40, **Supplementary Fig. 8b**) yielded no noticeable improvements of its cytosolic expression. A time course study of the co-localization of RPN1, a subunit of the yeast proteasome, showed that upon nutrient depletion the proteasome initiates C28XylT4 degradation and recycling.<sup>7,8</sup> However, when fresh carbon and nitrogen resources are provided (*i.e.*, fresh YP galactose), the proteasome remains inactive and localized to the nucleus (**Supplementary Fig. 8c**). In addition, the expression of protein under galactose-inducible promoters is switched on when additional inducer (*i.e.*, galactose) is added to the media, leading to higher cytosolic expression of UGT73CY3. Extensive protein engineering efforts might be required to express fully functional and soluble C28XylT4 and C28ApiT4 in *Saccharomyces cerevisiae*.

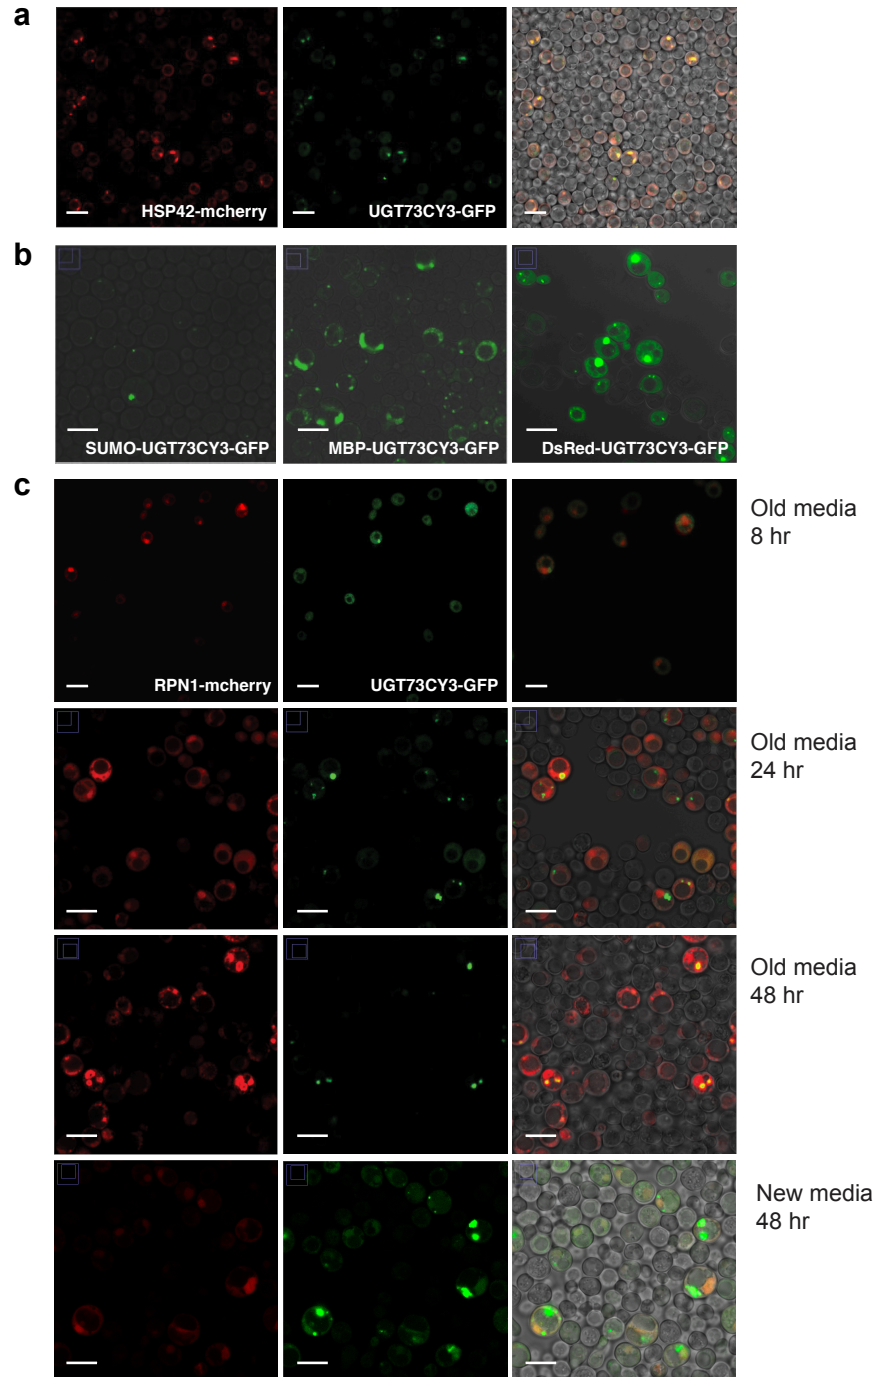

**Supplementary Fig. 8 Subcellular localization studies in yeast of XylT4, solubility tagged XylT4, colocalization studies with HSP42 and RPN1. a,** Confocal images of cells with overexpressed C-terminally mCherry-tagged HSP42, which is a yeast native chaperone protein visualized its co-localization with the GFP-tagged protein aggregates. **b,** Solubility tagging (*e.g.*, SUMO, MBP, DsRED) yielded no noticeable improvements of the cytosolic expression of the GT. **c,** A time course study of the co-localization of RPN1, a subunit of the yeast proteasome, showed that upon nutrient depletion the proteasome initiates C28XylT4 degradation and recycling. However, when fresh carbon and nitrogen resources are provided (*i.e.*, fresh YP galactose), the proteasome remained inactive and

localized to the nucleus. In addition, the expression of protein under galactose-inducible promoters is switched on when additional inducer was added to the media, leading to higher cytosolic expression of the GT. Images were acquired using a Zeiss LSM 710 confocal microscope (scale bar represents 10  $\mu\text{m}$ ; at least three independent experiments were conducted).

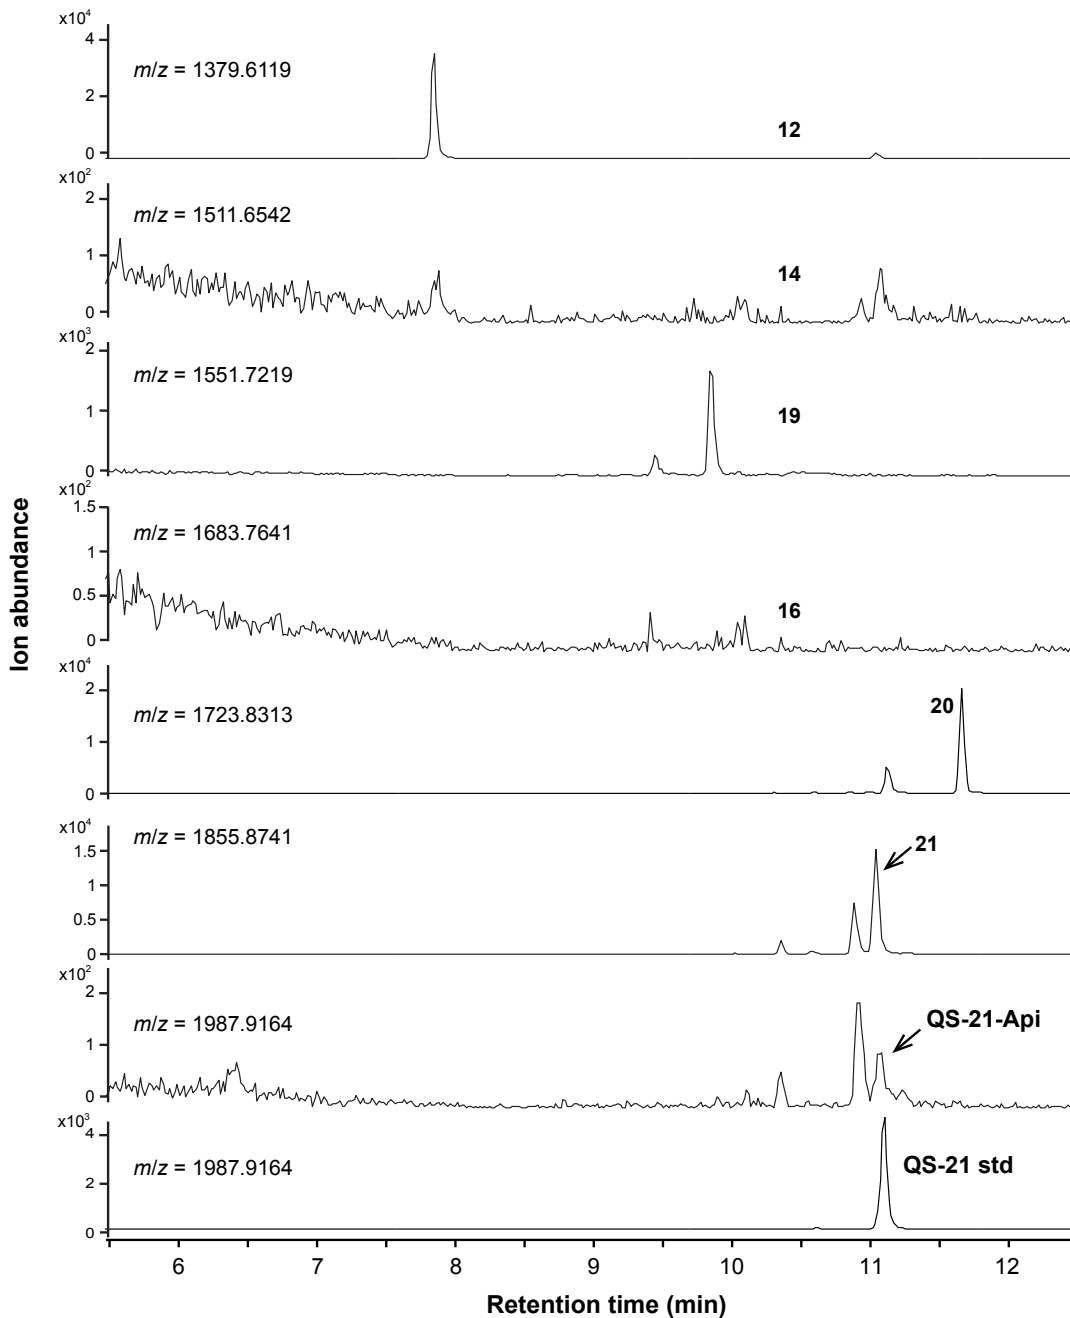

**Supplementary Fig. 9 Production of QS-21-Api in the engineered yeast strain (YL-47).** It was also observed from engineered yeasts that produce mono- and di-acylated as well as arabinofuranosylated C28-tri- and tetra-saccharides leading to the biosynthesis of QS-21-Api. The production of QS-21-Api was confirmed by its co-elution with the QS-21 standard. All LC-MS chromatograms were extracted with the theoretical  $m/z$  values of the respective compounds of interest.

### **QS-21 production and purification**

YL-46 was cultured in 10 mL YPD medium in a 50-mL glass tube at 30 °C, 200 rpm for 16-18 hours as the seed culture. The seed culture was inoculated into 24-deep well plates with 2 mL YPD per well with an initial OD600 of 0.3. A total of ten of 24-deep well plates (approximately 500 mL) were cultured at 30 °C, 200 rpm following the same as the yeast strain culture condition described in the manuscript. A total of 53.8 µg QS-21 was produced and quantified using LCMS. The 24-deep well plates were centrifuged at 3000 g for 2 mins from which the supernatant was discarded and the cell pellets were washed with 500 µL H<sub>2</sub>O per well and resuspended in 800 µL of MeOH/H<sub>2</sub>O (v:v=1:1) per well for QS-21 extraction by bead beating (3800 HZ, 3 mins). The cell pellets were extracted twice to yield a total of 41.9 µg of QS-21 in 200 mL of MeOH/H<sub>2</sub>O. Crude extracts from cell culture were fractionated by Reverse Phase-HPLC on an Agilent Prep-C18 column (5 µm, 21.2 x 150 mm) using a linear gradient of 0-45% acetonitrile (0.1% formic acid) in water (0.1% formic acid) over 4 min followed by 45-75% acetonitrile (0.1% formic acid) in water (0.1% formic acid) over 14 min at a flow rate of 4 mL/min, and finally followed by isocratic 75% acetonitrile (0.1% formic acid) in water (0.1% formic acid) for 3 min. The QS-21-Xyl peak area (t<sub>R</sub>19.6 min to 19.9 min) was collected and lyophilized. This crude QS-21 fraction was injected on an Agilent Zorbax Eclipse XDB-C18 semi-prep Column (5 µm, 9.4 x 250 mm) using a linear gradient of 30-50% over 18 min at a flow rate of 4 mL/min followed by isocratic 50% acetonitrile (0.1% formic acid) in water (0.1% formic acid) for 5 min. The QS-21-Xyl peak (t<sub>R</sub> = 19.9 min) was collected and lyophilized for MS and NMR analyses.

## Tandem mass spectrometry

Samples and a QS-21 standard were analyzed using a liquid chromatography (LC) system (1200 series, Agilent Technologies, Santa Clara, CA) that was connected in line with a Thermo Exploris 120 mass spectrometer equipped with an electrospray ionization (ESI) source (Thermo Fisher Scientific, Waltham, MA) in negative ionization mode. LCMS method parameters are defined in **Supplementary Table 6**. The LC system contained the following modules: G1322A solvent degasser, G7120A binary pump, G1316C thermostatted column compartment, and G7167B autosampler unit (Agilent). Metabolites were separated using an Agilent 1290 series HPLC installed with a Kinetex 2.6  $\mu\text{m}$  XB-C18 100 Å Column 50 x 2.1 mm column (00B-4496-AN, Phenomenex, Torrance, CA, USA). The MS data were acquired using an Orbitrap Exploris™ 120 Mass Spectrometer (Thermo Fisher Scientific, Waltham, MA, USA) in negative ionization mode. Raw files were converted to MZML using ProteoWizard MSConvert 3.0.21265-4230726.<sup>14</sup> Ion chromatograms and spectra were extracted using the RaMS package version 1.3.1 and plotted in base R 4.3.0<sup>15</sup>; vector-based PDFs were generated using Cairo 1.6. MS1 ion comparisons (SI x) are reported for the most intense ion across the EIC (with 5-ppm window). From a centroided mzml file, the most intense MS2 spectrum for each file was selected and then filtered to remove fragment ions <400 m/z and below 0.6% of the max intensity within each spectrum; a 15-ppm window was used to determine if sample fragment ions matched to standard reference compound fragment ions.

**Supplementary Table 6. LCMS method parameters used for QS-21 MS1 and MS2 measurement**

|                                       |                                               |
|---------------------------------------|-----------------------------------------------|
| <b>Ion Source</b>                     |                                               |
| Ion Source Type                       | H-ESI                                         |
| Spray Voltage                         | Static                                        |
| Negative Ion (V)                      | 3000                                          |
| Gas Mode                              | Static                                        |
| Sheath Gas (Arb)                      | 50                                            |
| Aux Gas (Arb)                         | 10                                            |
| Sweep Gas (Arb)                       | 2                                             |
| Ion Transfer Tube Temp (C)            | 325                                           |
| Vaporizer Temp (C)                    | 50                                            |
| Internal Mass calibration             | Easy-IC run start                             |
| <b>FULL MS settings</b>               |                                               |
| resolution                            | 120000                                        |
| AGC target                            | Standard                                      |
| Max. IT                               | 100 ms                                        |
| Scan range                            | 700-2200 m/z                                  |
| Spectrum data type                    | Profile                                       |
| RT lens (%)                           | 70                                            |
| Microscans                            | 1                                             |
| <b>dd-MS2 settings</b>                |                                               |
| intensity threshold                   | 2.00E+04                                      |
| Dynamic exclusion                     | exclude after 1 time, 1 sec, exclude isotopes |
| Mass Tolerance (ppm)                  | 0.1 (low); 5 (high)                           |
| Number of dependent scans             | 2                                             |
| isolation window (m/z)                | 0.5                                           |
| Normalized HCD collision energies (%) | 13,30,80                                      |
| resolution                            | 60000                                         |
| Scan Range Mode                       | Auto                                          |
| AGC target                            | Standard                                      |
| Max. IT                               | Auto                                          |
| Microscans                            | 10                                            |
| Spectrum data type                    | Profile                                       |



| Target ion |   |
|------------|---|
| m/z        | z |
| 1987.9133  | 1 |

**Supplementary Table 7. MS2 fragment ion masses and their corresponding intensities**

| Retention time (min) | precursor m/z | fragment m/z | intensity   | percent intensity | ppm difference | MS2 ion type            |
|----------------------|---------------|--------------|-------------|-------------------|----------------|-------------------------|
| 8.730585923          | 1987.912981   | 1988.916753  | 21407.15234 | 4.264490049       | 0.921671602    | 2 <sup>nd</sup> isotope |
| 8.730585923          | 1987.912981   | 1987.9072    | 501986.2188 | 100               | 0.553619908    | fragment                |
| 8.730585923          | 1987.912981   | 1987.5341    | 3314.69458  | 0.660315853       | 0.306359043    | fragment                |
| 8.730585923          | 1987.912981   | 1969.9118    | 25213.80664 | 5.022808535       | 1.082766731    | fragment                |
| 8.730585923          | 1987.912981   | 1819.8519    | 4275.220703 | 0.851660971       | -0.64001375    | fragment                |
| 8.730585923          | 1987.912981   | 1725.7680    | 12801.62695 | 2.550194901       | 0.333040463    | fragment                |
| 8.730585923          | 1987.912981   | 1665.7498    | 8558.392578 | 1.704905884       | -0.79995268    | fragment                |
| 8.730585923          | 1987.912981   | 1647.7350    | 24422.74219 | 4.865221649       | 0.081041332    | fragment                |
| 8.730585923          | 1987.912981   | 1553.6701    | 88885.67188 | 17.70679524       | -0.04390845    | fragment                |
| 8.730585923          | 1987.912981   | 1511.6571    | 20978.5625  | 4.179111242       | -0.45923246    | fragment                |
| 8.730585923          | 1987.912981   | 955.4534     | 37817.30469 | 7.533534443       | -1.30111594    | fragment                |
| 8.730585923          | 1987.912981   | 485.3260     | 3084.617676 | 0.614482542       | -1.46605919    | fragment                |
| 8.730585923          | 1987.912981   | 469.1569     | 3207.034424 | 0.638869018       | -2.99292551    | fragment                |
| 8.730585923          | 1987.912981   | 405.3165     | 5145.628906 | 1.025053819       | -2.16833423    | fragment                |

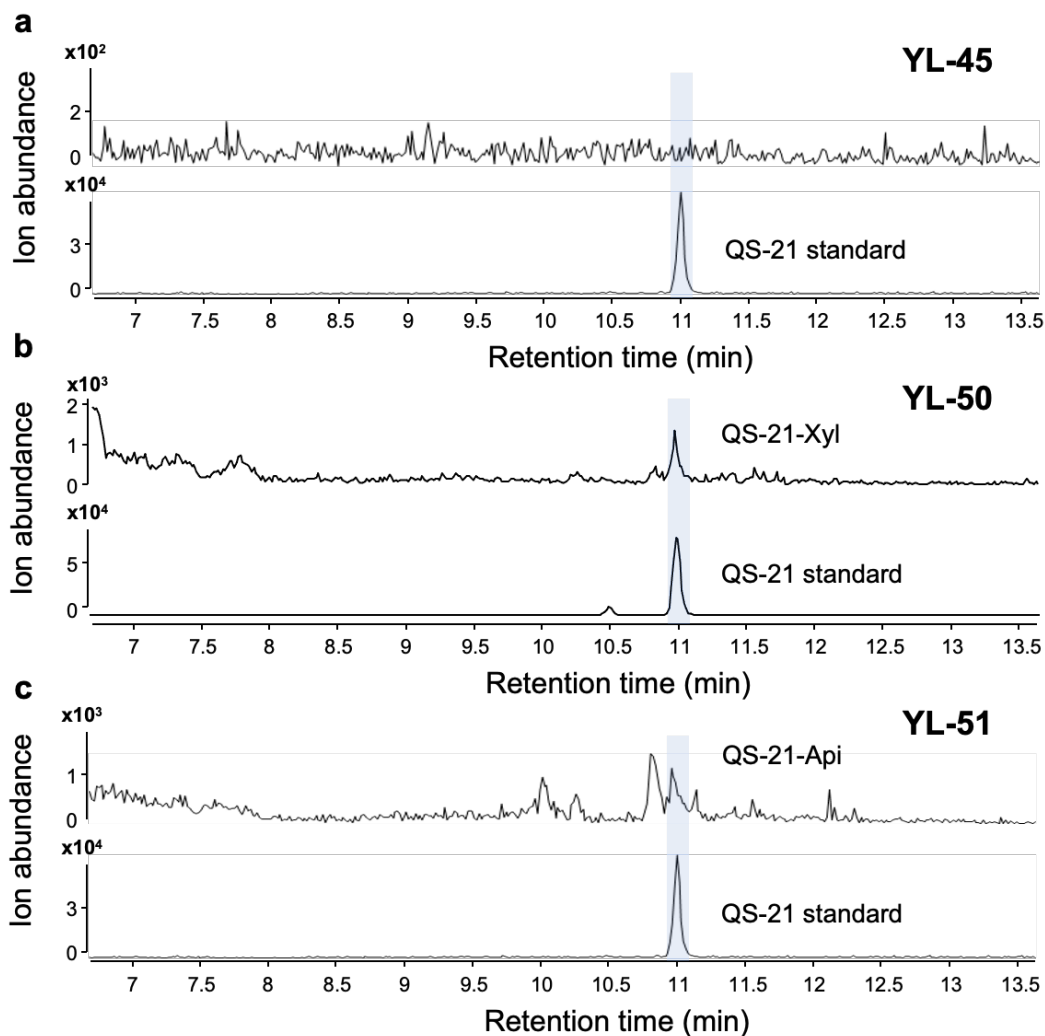

**Supplementary Fig. 10 Total biosynthesis of QS-21 from simple sugars using engineered yeast strains compared to the QS-21 standard.** **a**, No QS-21 was detected in the background strain YL-45. **b**, QS-21-Xyl produced by engineered yeast YL-50. **c**, QS-21-Api produced by engineered yeast YL-51. All LC-MS chromatograms were extracted with the theoretical  $m/z$  values of the respective compounds of interest.

### Calculations of the QS-21 content and production rate in *Q. saponaria* and *S. cerevisiae*

***Q. saponaria***: The production of QS-21 mainly is sourced from the bark, which is approximately 20% of the tree mass. Of bark, extraction and dialysis led to a crude extract DQ.<sup>9</sup> Further purification of DQ led to the saponin mixture Quil A (250 mg from the pool of 6 batches of 5 g of bark,<sup>9,10</sup> 0.8% yield from the bark). From Quil A, the purification of QS-21 was recently reported to be approximately 2%.<sup>11,12</sup>

The overall QS-21 yield from *Q. saponaria*:

$$20\% * \frac{250 \text{ mg}}{5 \text{ g} * 6} * 2\% = 0.0032\%$$

*Quillaja saponaria* produces QS-21 after 30-50 years<sup>17</sup> and a maximum of 35% of the basal tree area can be extracted every 5-10 years from the same site, enforced by the forestry management plan has been approved by CONAE<sup>17</sup>, which makes its rate of production:

$$\frac{0.0032\%}{10 \text{ years}} \frac{1 \text{ year}}{365 \text{ days}} * 35\% = 3 \cdot 10^{-7}\%/\text{day}$$

***S. cerevisiae***: Yeast dry cell weight is approximately 7.04 g L<sup>-1</sup> which can be calculated based on the OD of 25 divided by the index of OD conversion to dry cell weight (25/3.55 = 7.04 g L<sup>-1</sup>).<sup>13</sup> The titer of QS-21 in YL-46 is 0.9 mg L<sup>-1</sup>, which led to the QS-21 content in yeast to be:

$$\frac{0.09 \frac{\text{mg}}{\text{L}}}{25 * \frac{1 \text{ g DCW}}{3.55 \text{ L}}} = 0.0012\%$$

*S. cerevisiae* produces that amount over a period of approximately 4 days, which makes its rate of production:

$$\frac{0.0012\%}{4 \text{ days}} = 3 \cdot 10^{-4}\%/\text{day}$$

Hence, unoptimized *S. cerevisiae* produces QS-21-xyI at approximately 1,000 times the rate of *Q. saponaria*.

## References

1. Reed, J. *et al.* Elucidation of the pathway for biosynthesis of saponin adjuvants from the soapbark tree. *Science*, **379**, 1252-1264 (2023).
2. Chen, X. *et al.* Deciphering triterpenoid saponin biosynthesis by leveraging transcriptome response to Methyl Jasmonate elicitation in *Saponaria vaccaria*. *Nat. Comm.* **14**, 7101 (2023).
3. Martin, L.B.B. *et al.* Complete biosynthesis of the potent vaccine adjuvant QS-21. *Nat. Chem. Biol.* *Accepted*.
4. Wong, J., d’Espaux, L., Dev, I., van der Horst, C. & Keasling, J. *De novo* synthesis of the sedative valerenic acid in *Saccharomyces cerevisiae*. *Metab. Eng.* **47**, 94–101 (2018).
5. Sathyanarayanan, U. *et al.* ATP hydrolysis by yeast Hsp104 determines protein aggregate dissolution and size in vivo. *Nat. Commun.* **11**, 5226 (2020).
6. Lee, H.-Y., Chao, J.-C., Cheng, K.-Y. & Leu, J.-Y. Misfolding-prone proteins are reversibly sequestered to an Hsp42-associated granule upon chronological aging. *J. Cell Sci.* **131**, jcs.220202 (2018).
7. van Deventer, S., Menendez-Benito, V., van Leeuwen, F. & Neefjes, J. N-terminal acetylation and replicative age affect proteasome localization and cell fitness during aging. *J. Cell Sci.* **128**, 109–117 (2015).
8. Enenkel, C., Kang, R. W., Wilfling, F. & Ernst, O. P. Intracellular localization of the proteasome in response to stress conditions. *J. Biol. Chem.* **298**, 102083 (2022).
9. Dalsgaard, K. Saponin adjuvants. I. The presence of a non-dialysable fraction of *Quillaja saponaria* Molina with adjuvant activity in foot-and-mouth disease vaccines. *Bull. Off. int. Epiz.* **77**, 1289-1295 (1972).
10. Dalsgaard, K. Saponin adjuvants III. Isolation of a substance from *Quillaja saponaria* molina with adjuvant activity in foot-and-mouth disease vaccines. *Archiv fir die gesamte Virusforschung* **44**, 243-254 (1974).
11. *Saponins Used in Traditional and Modern Medicine*, Springer New York, NY (1996).
12. Qi, Y. & Fox, C. B. A Two-step orthogonal chromatographic process for purifying the molecular adjuvant QS-21 with high purity and yield. *J. Chromatogr. A* **1635**, 461705 (2021).
13. Garay-Arroyo, A. *et al.* Response to different environmental stress conditions of industrial and laboratory *Saccharomyces cerevisiae* strains. *Appl. Microbiol. Biotechnol.* **63**, 734–741 (2004).
14. Chambers, *et al.* A cross-platform toolkit for mass spectrometry and proteomics. *Nat. Biotechnol.* **30**, 918-920 (2012).
15. R Core Team (2023). *\_R: A Language and Environment for Statistical Computing\_*. R Foundation for Statistical Computing, Vienna, Austria. <<https://www.R-project.org/>>.
16. Wallace, F., Fontana, C., Ferreira, F., Olivaro, C. Structure elucidation of triterpenoid saponins found in an immunoadjuvant preparation of *Quillaja brasiliensis* using mass spectrometry and <sup>1</sup>H and <sup>13</sup>C NMR spectroscopy. *Molecules* **27**, 2402 (2022).
17. San Martin, R., Briones, R. Industrial uses and sustainable supply of *Quillaja saponaria* (Rosaceae) saponins. *Econ. Bot.* **53**, 302–311 (1999).
